# Supplementary material for: Passive case detection of malaria in Ratanakiri Province (Cambodia) to detect villages at higher risk for malaria
Source: PubMed Central journal article supplement (PMC5340042; doi:10.1186/s12936-017-1758-3), 2017-03-06
Supplement: 12936_2017_1758_MOESM8_ESM.pdf [file 12936_2017_1758_MOESM8_ESM.pdf]

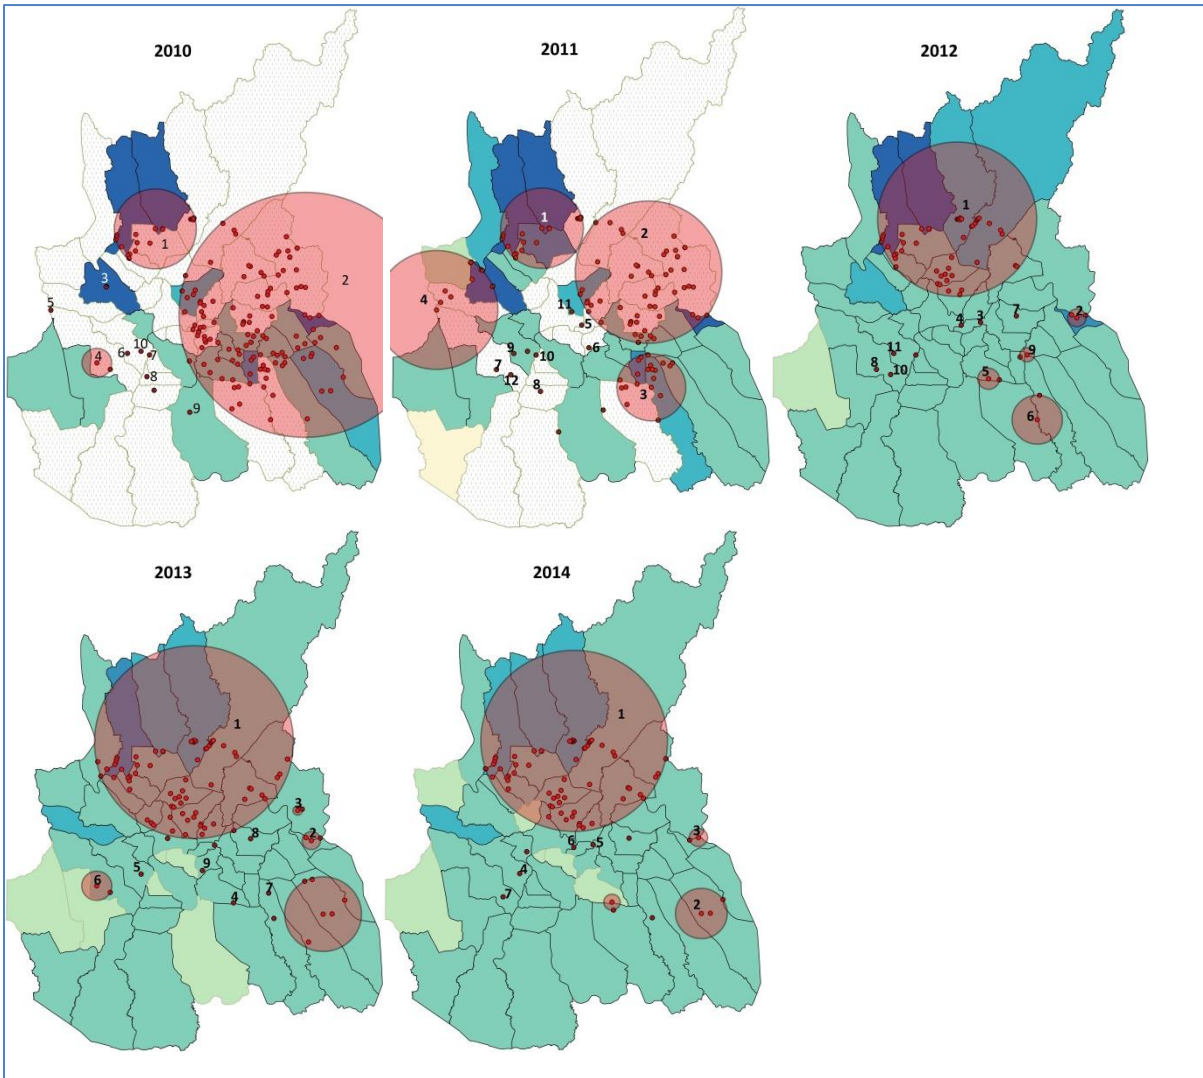

Spatial clusters of *Falciparum* malaria cases.
