# Supplementary material for: Passive case detection of malaria in Ratanakiri Province (Cambodia) to detect villages at higher risk for malaria
Source: Springer Nature journal article supplement (doi:10.1186/s12936-017-1758-3), 2017-03-06
Supplement: MOESM4 [file 12118692]

Annual incidence rates per 1000 inhabitants for all reporting villages.

| Year                                 | No. villages reporting | Population | Incidence rate for all reporting villages | Median incidence rate (Q1 - Q3) |
|--------------------------------------|------------------------|------------|-------------------------------------------|---------------------------------|
| <b>All <i>Plasmodium</i> species</b> |                        |            |                                           |                                 |
| 2010                                 | 174                    | 109,734    | 73.76                                     | 70.66 (21.18 - 182.70)          |
| 2011                                 | 200                    | 123,247    | 73.15                                     | 51.79 (13.80 - 165.90)          |
| 2012                                 | 263                    | 165,537    | 39.94                                     | 31.37 (10.69 - 91.58)           |
| 2013                                 | 252                    | 160,062    | 21.91                                     | 14.98 (5.89 - 45.61)            |
| 2014                                 | 226                    | 148,710    | 25.25                                     | 16.94 (5.85 - 59.45)            |
| <b><i>P. falciparum</i></b>          |                        |            |                                           |                                 |
| 2010                                 | 174                    | 109,734    | 62.48                                     | 61.21 (11.85 - 154.90)          |
| 2011                                 | 200                    | 123,247    | 55.05                                     | 41.84 (4.75 - 108.90)           |
| 2012                                 | 263                    | 165,537    | 21.88                                     | 15.78 (5.15 - 37.86)            |
| 2013                                 | 252                    | 160,062    | 11.14                                     | 5.81 (1.95 - 18.82)             |
| 2014                                 | 226                    | 148,710    | 12.85                                     | 6.16 (1.59 - 21.56)             |
| <b><i>P. vivax</i></b>               |                        |            |                                           |                                 |
| 2010                                 | 174                    | 109,734    | 14.7                                      | 9.91 (2.00 - 29.63)             |
| 2011                                 | 200                    | 123,247    | 19.79                                     | 10.56 (2.55 - 39.02)            |
| 2012                                 | 263                    | 165,537    | 12.46                                     | 7.94 (2.15 - 23.88)             |
| 2013                                 | 252                    | 160,062    | 7.39                                      | 4.63 (1.69 - 14.21)             |
| 2014                                 | 226                    | 148,710    | 9.81                                      | 7.34 (2.71 - 18.19)             |
| <b>Mixed infection</b>               |                        |            |                                           |                                 |
| 2010                                 | 174                    | 109,734    | 1.72                                      | 0.00 (0.00 - 0.51)              |
| 2011                                 | 200                    | 123,247    | 2.35                                      | 0.00 (0.00 - 2.67)              |
| 2012                                 | 263                    | 165,537    | 4.68                                      | 1.30 (0.00 - 6.88)              |
| 2013                                 | 252                    | 160,062    | 2.97                                      | 0.00 (0.00 - 3.81)              |
| 2014                                 | 226                    | 148,710    | 4.15                                      | 0.71 (0.00 - 4.63)              |
