# Supplementary material for: Passive case detection of malaria in Ratanakiri Province (Cambodia) to detect villages at higher risk for malaria
Source: Springer Nature journal article supplement (doi:10.1186/s12936-017-1758-3), 2017-03-06
Supplement: MOESM7 [file 12118692]

**Spatial clusters of villages with significant higher risk for all malaria cases (all *plasmodium* species combined) from 2010-2014 in Ratanakiri Province.**

| Year | Cluster | No. villages | Latitude  | Longitude  | Radius   | Observed | Expected | RR    | LLR     | p-value |
|------|---------|--------------|-----------|------------|----------|----------|----------|-------|---------|---------|
|      |         |              |           |            |          | cases    | cases    |       |         |         |
| 2010 | 1       | 21           | 14.046359 | 106.965239 | 13.01 km | 1620     | 379      | 5.09  | 1218.22 | <0.0001 |
| 2010 | 2       | 62           | 13.918318 | 107.275887 | 23.06 km | 2402     | 1339     | 2.13  | 429.30  | <0.0001 |
| 2010 | 3       | 7            | 13.489193 | 107.411705 | 17.76 km | 387      | 94       | 4.26  | 259.11  | <0.0001 |
| 2010 | 4       | 2            | 13.87759  | 106.82178  | 0.18 km  | 170      | 18       | 9.38  | 227.26  | <0.0001 |
| 2010 | 5       | 2            | 13.606855 | 107.161185 | 3.43 km  | 183      | 27       | 7.03  | 198.27  | <0.0001 |
| 2010 | 6       | 1            | 13.763939 | 107.081181 | 0 km     | 125      | 15       | 8.55  | 157.08  | <0.0001 |
| 2010 | 7       | 4            | 13.661849 | 107.246883 | 4.16 km  | 234      | 73       | 3.26  | 112.84  | <0.0001 |
| 2010 | 8       | 1            | 13.808123 | 106.658254 | 0 km     | 51       | 3        | 17.48 | 97.70   | <0.0001 |
| 2010 | 9       | 1            | 13.658898 | 107.065608 | 0 km     | 133      | 30       | 4.55  | 97.11   | <0.0001 |
| 2010 | 10      | 2            | 13.653405 | 106.793476 | 4.74 km  | 116      | 25       | 4.66  | 86.83   | <0.0001 |
| 2010 | 11      | 1            | 13.676677 | 106.948091 | 0 km     | 76       | 18       | 4.36  | 53.13   | <0.0001 |
| 2010 | 12      | 1            | 13.681226 | 106.883364 | 0 km     | 31       | 3        | 10.25 | 44.11   | <0.0001 |
| 2010 | 13      | 1            | 13.61297  | 106.940432 | 0 km     | 62       | 17       | 3.75  | 36.30   | <0.0001 |
| 2010 | 14      | 1            | 13.687627 | 106.923078 | 0 km     | 68       | 26       | 2.66  | 24.06   | <0.0001 |
| 2010 | 15      | 1            | 13.508686 | 107.066478 | 0 km     | 45       | 22       | 2.04  | 9.12    | 0.0140  |
| 2010 | 16      | 1            | 13.751598 | 106.943513 | 0 km     | 40       | 20       | 2.04  | 8.13    | 0.0390  |
| 2011 | 1       | 25           | 14.046359 | 106.965239 | 13.01 km | 2158     | 422      | 6.41  | 1974.11 | <0.0001 |
| 2011 | 2       | 62           | 13.918318 | 107.275887 | 23.06 km | 2697     | 1491     | 2.15  | 494.66  | <0.0001 |
| 2011 | 3       | 20           | 13.582501 | 107.28396  | 10.85 km | 921      | 477      | 2.04  | 174.07  | <0.0001 |
| 2011 | 4       | 1            | 13.763939 | 107.081181 | 0 km     | 70       | 17       | 4.26  | 47.78   | <0.0001 |
| 2011 | 5       | 2            | 13.698092 | 107.102015 | 0 km     | 91       | 29       | 3.11  | 41.28   | <0.0001 |
| 2011 | 6       | 1            | 13.570719 | 106.960832 | 0 km     | 105      | 42       | 2.53  | 33.71   | <0.0001 |
| 2011 | 7       | 1            | 13.681226 | 106.883364 | 0 km     | 22       | 3        | 6.52  | 22.60   | <0.0001 |
| 2011 | 8       | 1            | 13.687627 | 106.923078 | 0 km     | 66       | 29       | 2.32  | 17.91   | <0.0001 |
| 2011 | 9       | 1            | 13.802734 | 107.052193 | 0 km     | 51       | 20       | 2.57  | 16.87   | <0.0001 |
| 2011 | 10      | 1            | 13.634391 | 106.832738 | 0 km     | 48       | 18       | 2.63  | 16.61   | <0.0001 |
| 2011 | 11      | 1            | 13.452596 | 107.013707 | 0 km     | 82       | 43       | 1.93  | 14.28   | 0.0003  |
| 2011 | 12      | 1            | 13.61297  | 106.940432 | 0 km     | 2        | 19       | 2.38  | 12.60   | 0.0012  |
| 2011 | 13      | 1            | 13.733332 | 107.089609 | 0 km     | 51       | 24       | 2.12  | 11.29   | 0.0038  |
| 2011 | 14      | 1            | 13.676677 | 106.948091 | 0 km     | 42       | 20       | 2.15  | 9.69    | 0.0140  |
| 2012 | 1       | 49           | 14.045257 | 106.987059 | 19.15 km | 2560     | 705      | 5.3   | 1775.32 | <0.0001 |
| 2012 | 2       | 14           | 13.874754 | 107.406388 | 11.09 km | 597      | 277      | 2.27  | 146.70  | <0.0001 |
| 2012 | 3       | 1            | 13.772103 | 107.13765  | 0 km     | 53       | 8        | 6.76  | 55.97   | <0.0001 |
| 2012 | 4       | 1            | 13.866858 | 107.082418 | 0 km     | 83       | 26       | 3.22  | 39.50   | <0.0001 |
| 2012 | 5       | 5            | 13.489193 | 107.411705 | 13.33 km | 125      | 55       | 2.29  | 32.88   | <0.0001 |
| 2012 | 6       | 1            | 13.791049 | 107.242711 | 0 km     | 48       | 12       | 4.08  | 31.18   | <0.0001 |
| 2012 | 7       | 2            | 13.606855 | 107.161185 | 3.43 km  | 64       | 22       | 2.97  | 27.06   | <0.0001 |
| 2012 | 8       | 1            | 13.763939 | 107.081181 | 0 km     | 42       | 12       | 3.48  | 22.41   | <0.0001 |
| 2012 | 9       | 1            | 13.707231 | 106.861432 | 0 km     | 61       | 26       | 2.36  | 17.17   | <0.0001 |
| 2012 | 10      | 1            | 13.803495 | 107.101079 | 0 km     | 28       | 9        | 3.16  | 13.05   | 0.0005  |
| 2012 | 11      | 1            | 13.731991 | 107.379434 | 0 km     | 54       | 26       | 2.11  | 11.85   | 0.0015  |
| 2012 | 12      | 1            | 13.632246 | 107.295395 | 0 km     | 35       | 15       | 2.34  | 9.68    | 0.0110  |
| 2012 | 13      | 1            | 13.653769 | 107.345607 | 0 km     | 35       | 15       | 2.31  | 9.41    | 0.0120  |
| 2013 | 1       | 47           | 14.046359 | 106.965239 | 19.01 km | 1519     | 376      | 6.36  | 1216.84 | <0.0001 |
| 2013 | 2       | 3            | 13.785518 | 107.419929 | 2.90 km  | 108      | 30       | 3.71  | 61.77   | <0.0001 |
| 2013 | 3       | 2            | 13.873367 | 107.380064 | 1.50 km  | 54       | 12       | 4.66  | 40.44   | <0.0001 |
| 2013 | 4       | 1            | 13.60384  | 107.192836 | 0 km     | 31       | 5        | 6.39  | 31.25   | <0.0001 |
| 2013 | 5       | 2            | 13.853864 | 107.076892 | 1.56 km  | 61       | 19       | 3.32  | 30.33   | <0.0001 |
| 2013 | 6       | 7            | 13.67964  | 106.843052 | 6.10 km  | 141      | 72       | 2     | 26.66   | <0.0001 |
| 2013 | 7       | 2            | 13.611548 | 107.517401 | 5.97 km  | 37       | 8        | 4.41  | 26.17   | <0.0001 |
| 2013 | 8       | 1            | 13.687627 | 106.923078 | 0 km     | 36       | 11       | 3.26  | 17.51   | <0.0001 |
| 2013 | 9       | 1            | 13.791049 | 107.242711 | 0 km     | 25       | 6        | 4.01  | 15.90   | <0.0001 |
| 2013 | 10      | 1            | 13.632246 | 107.295395 | 0 km     | 28       | 8        | 3.54  | 15.24   | 0.0001  |
| 2014 | 1       | 41           | 14.046359 | 106.965239 | 18.13 km | 1123     | 339      | 4.3   | 658.33  | <0.0001 |
| 2014 | 2       | 7            | 13.681226 | 106.883364 | 4.36 km  | 315      | 93       | 3.62  | 170.14  | <0.0001 |
| 2014 | 3       | 3            | 13.57074  | 107.454313 | 8.19 km  | 120      | 19       | 6.34  | 119.13  | <0.0001 |
| 2014 | 4       | 3            | 13.785518 | 107.419929 | 2.90 km  | 135      | 32       | 4.35  | 93.10   | <0.0001 |
| 2014 | 5       | 1            | 13.772103 | 107.13765  | 0 km     | 31       | 4        | 6.96  | 33.52   | <0.0001 |
| 2014 | 6       | 2            | 13.74949  | 106.954309 | 1.19 km  | 54       | 15       | 3.75  | 31.57   | <0.0001 |
| 2014 | 7       | 1            | 13.632246 | 107.295395 | 0 km     | 36       | 9        | 4.26  | 24.50   | <0.0001 |
| 2014 | 8       | 1            | 13.866858 | 107.082418 | 0 km     | 48       | 15       | 3.27  | 23.45   | <0.0001 |
| 2014 | 9       | 1            | 13.791049 | 107.242711 | 0 km     | 26       | 7        | 3.89  | 15.97   | 0.0001  |
| 2014 | 10      | 1            | 13.803495 | 107.101079 | 0 km     | 21       | 5        | 4.18  | 14.02   | 0.0003  |
| 2014 | 11      | 1            | 13.763939 | 107.081181 | 0 km     | 22       | 7        | 3.21  | 10.49   | 0.0140  |
| 2014 | 12      | 1            | 13.789543 | 107.307792 | 0 km     | 29       | 11       | 2.55  | 9.47    | 0.0210  |
