# Supplementary material for: Passive case detection of malaria in Ratanakiri Province (Cambodia) to detect villages at higher risk for malaria
Source: Springer Nature journal article supplement (doi:10.1186/s12936-017-1758-3), 2017-03-06
Supplement: MOESM9 [file 12118692]

**Spatial clusters of villages with significant higher risk for *Falciparum* malaria cases from 2010-2014 in Ratanakiri Province.**

| Year | Cluster | No. villages | Latitude  | Longitude  | Radius   | Observed |                | RR    | LLR     | p-value |
|------|---------|--------------|-----------|------------|----------|----------|----------------|-------|---------|---------|
|      |         |              |           |            |          | cases    | Expected cases |       |         |         |
| 2010 | 1       | 21           | 14.046359 | 106.965239 | 13.01 km | 1302     | 300            | 5.19  | 995.96  | <0.0001 |
| 2010 | 2       | 131          | 13.794314 | 107.404628 | 39.92 km | 3637     | 2580           | 1.95  | 353.24  | <0.0001 |
| 2010 | 3       | 2            | 13.87759  | 106.82178  | 0.18 km  | 143      | 15             | 9.98  | 198.98  | <0.0001 |
| 2010 | 4       | 2            | 13.653405 | 106.793476 | 4.74 km  | 111      | 20             | 5.64  | 100.09  | <0.0001 |
| 2010 | 5       | 1            | 13.808123 | 106.658254 | 0 km     | 30       | 2              | 12.96 | 49.12   | <0.0001 |
| 2010 | 6       | 1            | 13.681226 | 106.883364 | 0 km     | 29       | 2              | 12.11 | 45.67   | <0.0001 |
| 2010 | 7       | 1            | 13.676677 | 106.948091 | 0 km     | 62       | 14             | 4.49  | 44.77   | <0.0001 |
| 2010 | 8       | 1            | 13.61297  | 106.940432 | 0 km     | 49       | 13             | 3.74  | 28.62   | <0.0001 |
| 2010 | 9       | 1            | 13.508686 | 107.066478 | 0 km     | 44       | 18             | 2.52  | 14.11   | 0.0002  |
| 2010 | 10      | 1            | 13.687627 | 106.923078 | 0 km     | 44       | 20             | 2.17  | 10.36   | 0.0054  |
| 2011 | 1       | 21           | 14.046359 | 106.965239 | 13.01 km | 1570     | 301            | 6.58  | 1465.65 | <0.0001 |
| 2011 | 2       | 62           | 13.918318 | 107.275887 | 23.06 km | 2005     | 1064           | 2.29  | 417.68  | <0.0001 |
| 2011 | 3       | 20           | 13.582501 | 107.28396  | 10.85 km | 705      | 340            | 2.21  | 160.33  | <0.0001 |
| 2011 | 4       | 11           | 13.808123 | 106.658254 | 19.26 km | 315      | 162            | 2     | 58.52   | <0.0001 |
| 2011 | 5       | 1            | 13.763939 | 107.081181 | 0 km     | 59       | 12             | 5.05  | 48.02   | <0.0001 |
| 2011 | 6       | 2            | 13.698092 | 107.102015 | 0 km     | 75       | 21             | 3.6   | 41.64   | <0.0001 |
| 2011 | 7       | 1            | 13.634391 | 106.832738 | 0 km     | 48       | 13             | 3.69  | 27.63   | <0.0001 |
| 2011 | 8       | 1            | 13.570719 | 106.960832 | 0 km     | 78       | 30             | 2.64  | 26.99   | <0.0001 |
| 2011 | 9       | 1            | 13.681226 | 106.883364 | 0 km     | 19       | 2              | 7.9   | 22.65   | <0.0001 |
| 2011 | 10      | 1            | 13.676677 | 106.948091 | 0 km     | 38       | 14             | 2.73  | 14.08   | 0.0002  |
| 2011 | 11      | 1            | 13.802734 | 107.052193 | 0 km     | 37       | 14             | 2.61  | 12.63   | 0.0009  |
| 2011 | 12      | 1            | 13.619313 | 106.874335 | 0 km     | 21       | 7              | 2.88  | 8.48    | 0.0390  |
| 2012 | 1       | 53           | 14.074678 | 107.069142 | 25.14 km | 1470     | 421            | 5.13  | 978.52  | <0.0001 |
| 2012 | 2       | 3            | 13.785518 | 107.419929 | 2.90 km  | 155      | 32             | 5.09  | 125.58  | <0.0001 |
| 2012 | 3       | 1            | 13.772103 | 107.13765  | 0 km     | 45       | 4              | 10.28 | 64.00   | <0.0001 |
| 2012 | 4       | 1            | 13.763939 | 107.081181 | 0 km     | 42       | 7              | 6.24  | 41.48   | <0.0001 |
| 2012 | 5       | 2            | 13.606855 | 107.161185 | 3.43 km  | 51       | 12             | 4.24  | 34.45   | <0.0001 |
| 2012 | 6       | 2            | 13.486845 | 107.303896 | 7.97 km  | 40       | 11             | 3.61  | 22.30   | <0.0001 |
| 2012 | 7       | 1            | 13.791049 | 107.242711 | 0 km     | 28       | 7              | 4.25  | 19.03   | <0.0001 |
| 2012 | 8       | 1            | 13.634391 | 106.832738 | 0 km     | 26       | 8              | 3.47  | 13.79   | 0.0003  |
| 2012 | 9       | 2            | 13.677142 | 107.274104 | 2.32 km  | 43       | 19             | 2.24  | 10.78   | 0.0041  |
| 2012 | 10      | 1            | 13.619313 | 106.874335 | 0 km     | 16       | 4              | 3.8   | 9.57    | 0.0160  |
| 2012 | 11      | 1            | 13.681226 | 106.883364 | 0 km     | 9        | 1              | 6.48  | 9.21    | 0.0200  |
| 2013 | 1       | 80           | 14.072846 | 107.077263 | 31.30 km | 1008     | 342            | 5.36  | 602.51  | <0.0001 |
| 2013 | 2       | 3            | 13.785518 | 107.419929 | 2.90 km  | 73       | 15             | 4.89  | 56.79   | <0.0001 |
| 2013 | 3       | 2            | 13.873367 | 107.380064 | 1.50 km  | 41       | 6              | 6.88  | 43.69   | <0.0001 |
| 2013 | 4       | 1            | 13.60384  | 107.192836 | 0 km     | 22       | 3              | 8.78  | 28.19   | <0.0001 |
| 2013 | 5       | 1            | 13.687627 | 106.923078 | 0 km     | 28       | 6              | 4.92  | 22.18   | <0.0001 |
| 2013 | 6       | 2            | 13.653405 | 106.793476 | 4.74 km  | 26       | 6              | 4.65  | 19.43   | <0.0001 |
| 2013 | 7       | 1            | 13.632246 | 107.295395 | 0 km     | 21       | 4              | 5.14  | 17.39   | <0.0001 |
| 2013 | 8       | 1            | 13.791049 | 107.242711 | 0 km     | 15       | 3              | 4.65  | 11.23   | 0.0030  |
| 2013 | 9       | 2            | 13.698092 | 107.102015 | 0 km     | 19       | 6              | 3.22  | 9.08    | 0.0230  |
| 2014 | 1       | 71           | 14.075614 | 107.082241 | 29.43 km | 894      | 293            | 5.07  | 535.37  | <0.0001 |
| 2014 | 2       | 3            | 13.57074  | 107.454313 | 8.19 km  | 73       | 9              | 8.11  | 87.67   | <0.0001 |
| 2014 | 3       | 2            | 13.792797 | 107.445777 | 2.90 km  | 54       | 10             | 5.62  | 48.25   | <0.0001 |
| 2014 | 4       | 1            | 13.687627 | 106.923078 | 0 km     | 36       | 6              | 6.42  | 36.28   | <0.0001 |
| 2014 | 5       | 1            | 13.772103 | 107.13765  | 0 km     | 22       | 2              | 10.35 | 31.43   | <0.0001 |
| 2014 | 6       | 1            | 13.763939 | 107.081181 | 0 km     | 14       | 3              | 4.27  | 9.57    | 0.0100  |
| 2014 | 7       | 1            | 13.619313 | 106.874335 | 0 km     | 11       | 2              | 5.4   | 9.56    | 0.0110  |
