# Supplementary material for: Passive case detection of malaria in Ratanakiri Province (Cambodia) to detect villages at higher risk for malaria
Source: Springer Nature journal article supplement (doi:10.1186/s12936-017-1758-3), 2017-03-06
Supplement: MOESM10 [file 12118692]

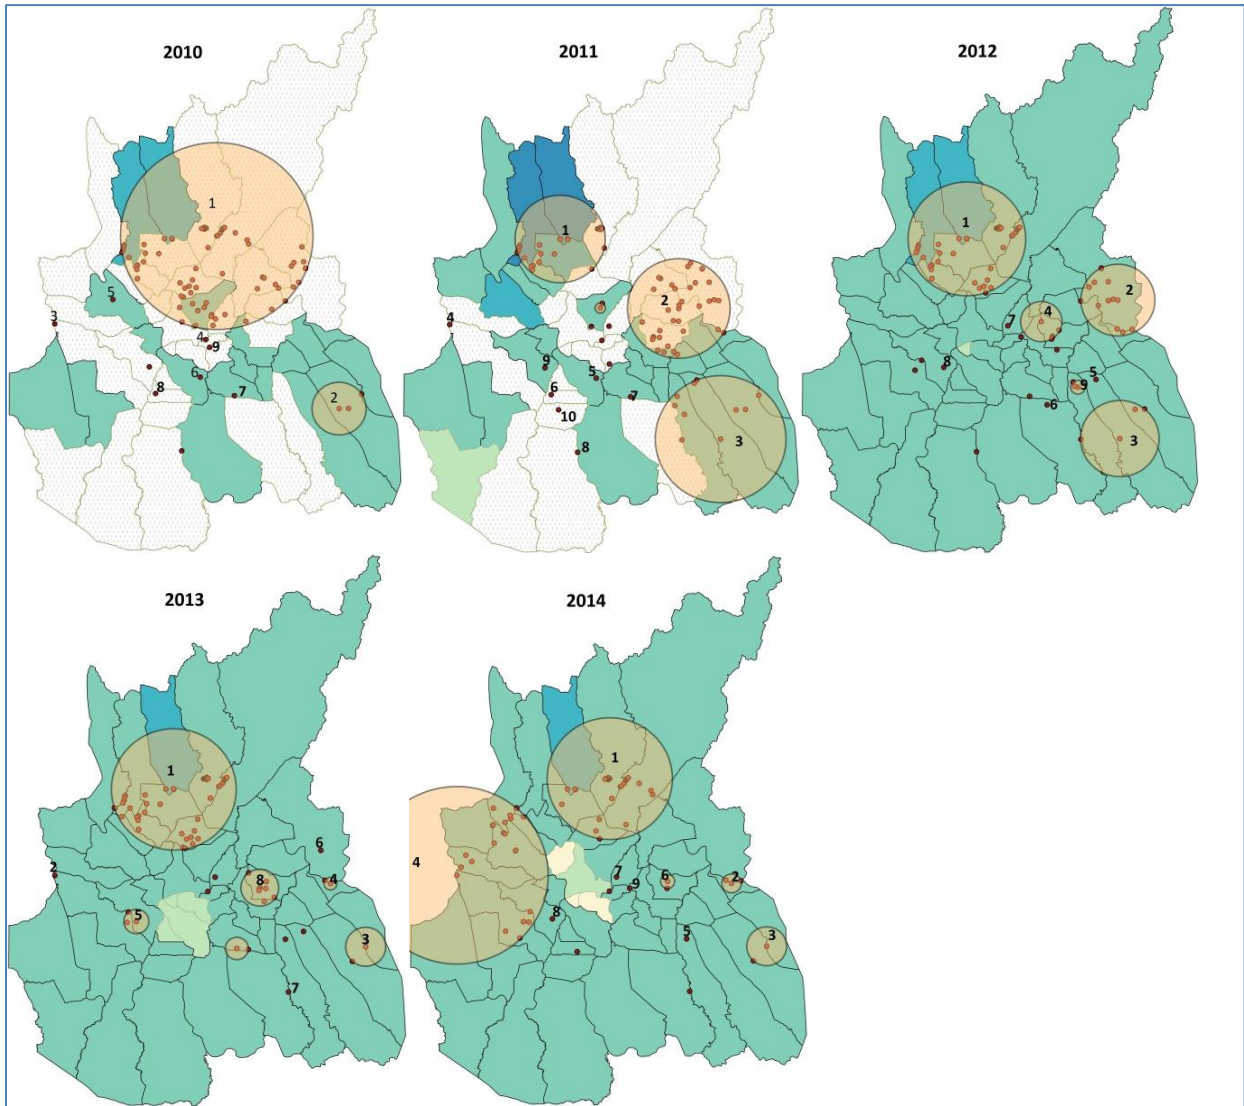

Spatial clusters of *Vivax* malaria cases.
