# Supplementary material for: Passive case detection of malaria in Ratanakiri Province (Cambodia) to detect villages at higher risk for malaria
Source: Springer Nature journal article supplement (doi:10.1186/s12936-017-1758-3), 2017-03-06
Supplement: MOESM11 [file 12118692]

**Spatial clusters of villages with significant higher risk for *Vivax* malaria cases from 2010-2014 in Ratanakiri Province.**

| Year | Cluster | No. villages | Latitude  | Longitude  | Radius   | Observed | Expected | RR    | LLR    | p-value |
|------|---------|--------------|-----------|------------|----------|----------|----------|-------|--------|---------|
|      |         |              |           |            |          | cases    | cases    |       |        |         |
| 2010 | 1       | 81           | 14.053707 | 107.11178  | 29.06 km | 705      | 285      | 3.77  | 301.22 | <0.0001 |
| 2010 | 2       | 3            | 13.57074  | 107.454313 | 8.19 km  | 77       | 8        | 10.33 | 108.60 | <0.0001 |
| 2010 | 3       | 1            | 13.808123 | 106.658254 | 0 km     | 21       | 1        | 38.94 | 56.30  | <0.0001 |
| 2010 | 4       | 1            | 13.763939 | 107.081181 | 0 km     | 34       | 3        | 12.57 | 54.44  | <0.0001 |
| 2010 | 5       | 1            | 13.876213 | 106.82098  | 0 km     | 26       | 2        | 12.8  | 42.12  | <0.0001 |
| 2010 | 6       | 1            | 13.658898 | 107.065608 | 0 km     | 37       | 6        | 6.85  | 39.28  | <0.0001 |
| 2010 | 7       | 1            | 13.606855 | 107.161185 | 0 km     | 20       | 3        | 7.11  | 21.94  | <0.0001 |
| 2010 | 8       | 1            | 13.61297  | 106.940432 | 0 km     | 13       | 3        | 4.22  | 8.76   | 0.0200  |
| 2010 | 9       | 1            | 13.742276 | 107.091971 | 0 km     | 8        | 1        | 6.71  | 8.41   | 0.0270  |
| 2011 | 1       | 25           | 14.046359 | 106.965239 | 13.51 km | 606      | 131      | 5.89  | 507.52 | <0.0001 |
| 2011 | 2       | 40           | 13.85282  | 107.295247 | 15.39 km | 532      | 259      | 2.37  | 129.22 | <0.0001 |
| 2011 | 3       | 10           | 13.489193 | 107.411705 | 19.63 km | 172      | 53       | 3.42  | 86.47  | <0.0001 |
| 2011 | 4       | 1            | 13.808123 | 106.658254 | 0 km     | 24       | 1        | 28.93 | 57.47  | <0.0001 |
| 2011 | 5       | 1            | 13.658898 | 107.065608 | 0 km     | 32       | 8        | 3.83  | 19.18  | <0.0001 |
| 2011 | 6       | 1            | 13.61297  | 106.940432 | 0 km     | 22       | 5        | 4.66  | 16.53  | <0.0001 |
| 2011 | 7       | 1            | 13.606855 | 107.161185 | 0 km     | 21       | 4        | 4.85  | 16.42  | <0.0001 |
| 2011 | 8       | 1            | 13.452596 | 107.013707 | 0 km     | 34       | 11       | 3.14  | 15.59  | 0.0001  |
| 2011 | 9       | 1            | 13.687627 | 106.923078 | 0 km     | 22       | 7        | 3.02  | 9.57   | 0.0110  |
| 2011 | 10      | 1            | 13.570719 | 106.960832 | 0 km     | 27       | 11       | 2.54  | 8.72   | 0.0320  |
| 2012 | 1       | 40           | 14.045257 | 106.987059 | 17.60 km | 694      | 176      | 5.39  | 510.99 | <0.0001 |
| 2012 | 2       | 15           | 13.874754 | 107.406388 | 11.10 km | 212      | 91       | 2.47  | 61.70  | <0.0001 |
| 2012 | 3       | 4            | 13.489193 | 107.411705 | 11.79 km | 55       | 13       | 4.3   | 37.63  | 0.0000  |
| 2012 | 4       | 5            | 13.815022 | 107.193675 | 6.21 km  | 63       | 22       | 2.89  | 25.22  | 0.0000  |
| 2012 | 5       | 1            | 13.653769 | 107.345607 | 0 km     | 26       | 5        | 5.41  | 22.59  | 0.0000  |
| 2012 | 6       | 1            | 13.583191 | 107.209723 | 0 km     | 18       | 4        | 4.11  | 11.78  | 0.0016  |
| 2012 | 7       | 1            | 13.803495 | 107.101079 | 0 km     | 13       | 3        | 4.6   | 9.65   | 0.012   |
| 2012 | 8       | 1            | 13.687627 | 106.923078 | 0 km     | 20       | 7        | 3.01  | 8.63   | 0.024   |
| 2012 | 9       | 3            | 13.632246 | 107.295395 | 2.15 km  | 27       | 11       | 2.51  | 8.57   | 0.027   |
| 2013 | 1       | 47           | 14.045257 | 106.987059 | 18.58 km | 473      | 124      | 5.62  | 347.31 | <0.0001 |
| 2013 | 2       | 1            | 13.808123 | 106.658254 | 0 km     | 20       | 0        | 46.53 | 57.07  | <0.0001 |
| 2013 | 3       | 2            | 13.611548 | 107.517401 | 5.97 km  | 31       | 3        | 10.92 | 45.61  | <0.0001 |
| 2013 | 4       | 2            | 13.785518 | 107.419929 | 1.92 km  | 24       | 5        | 4.45  | 17.08  | <0.0001 |
| 2013 | 5       | 3            | 13.681226 | 106.883364 | 3.74 km  | 36       | 14       | 2.65  | 12.42  | 0.0009  |
| 2013 | 6       | 1            | 13.877276 | 107.393375 | 0 km     | 11       | 2        | 7.18  | 12.18  | 0.0011  |
| 2013 | 7       | 1            | 13.486845 | 107.303896 | 0 km     | 8        | 1        | 7.8   | 9.44   | 0.0120  |
| 2013 | 8       | 8            | 13.774297 | 107.224708 | 5.63 km  | 45       | 22       | 2.07  | 9.21   | 0.0160  |
| 2014 | 1       | 27           | 14.075614 | 107.082241 | 18.72 km | 220      | 64       | 3.87  | 124.13 | <0.0001 |
| 2014 | 2       | 3            | 13.785518 | 107.419929 | 2.90 km  | 68       | 12       | 6.08  | 64.69  | <0.0001 |
| 2014 | 3       | 2            | 13.611548 | 107.517401 | 5.97 km  | 40       | 3        | 12.4  | 63.42  | <0.0001 |
| 2014 | 4       | 24           | 13.808123 | 106.658254 | 27.30 km | 216      | 101      | 2.36  | 54.77  | <0.0001 |
| 2014 | 5       | 1            | 13.632246 | 107.295395 | 0 km     | 24       | 3        | 7.82  | 28.26  | <0.0001 |
| 2014 | 6       | 2            | 13.791049 | 107.242711 | 2.11 km  | 29       | 7        | 4.26  | 19.67  | <0.0001 |
| 2014 | 7       | 1            | 13.803495 | 107.101079 | 0 km     | 13       | 2        | 7.1   | 14.26  | 0.0001  |
| 2014 | 8       | 1            | 13.687627 | 106.923078 | 0 km     | 16       | 4        | 3.71  | 9.23   | 0.0170  |
| 2014 | 9       | 1            | 13.772103 | 107.13765  | 0 km     | 9        | 2        | 5.52  | 7.98   | 0.0460  |
